# Supplementary material for: Decarbonisation of calcium carbonate in sodium hydroxide solutions under ambient conditions: effect of residence time and mixing rates
Source: Royal Society of Chemistry journal article supplement (doi:10.1039/d2cp01412b), 2022-01-01
Supplement: d2cp01412b1.pdf [file d2cp01412b1.pdf]

## Electronic Supplementary Information

*Residence time and stirring rate for each sample produced, linked to the phases compositions gained from TG analysis, and weight uptake observed; the Ca balance, expressed as the difference between the inbound and outbound gram of Ca, is also reported to validate the quantification performed.*

|                  | Residence<br>time (sec) | Stirring<br>rate (rpm) | Wt.%<br>Na <sub>2</sub> CO <sub>3</sub> ·H <sub>2</sub> O | Wt.%<br>Ca(OH) <sub>2</sub> | Wt.%<br>CaCO <sub>3</sub> | Wt.%<br>Na <sub>2</sub> CO <sub>3</sub> | Weight<br>uptake (%) | ΔCa (g) |
|------------------|-------------------------|------------------------|-----------------------------------------------------------|-----------------------------|---------------------------|-----------------------------------------|----------------------|---------|
| 40rpm_30 sec     | 30                      | 40                     | 49.6                                                      | 32.6                        | 10.3                      | 7.6                                     | 78.3                 | 0.2     |
| 40rpm_300 sec    | 300                     | 40                     | 53.6                                                      | 36.2                        | 7.8                       | 2.4                                     | 83.6                 | -0.2    |
| 40rpm_720 sec    | 720                     | 40                     | 59.5                                                      | 35.0                        | 3.3                       | 2.3                                     | 90.9                 | 0.2     |
| 40rpm_1200 sec   | 1200                    | 40                     | 60.8                                                      | 34.9                        | 2.5                       | 1.8                                     | 92.3                 | 0.2     |
| 300rpm_30 sec    | 30                      | 300                    | 18.0                                                      | 25.9                        | 30.5                      | 25.5                                    | 50.5                 | 0.2     |
| 300rpm_300 sec   | 300                     | 300                    | 23.6                                                      | 33.3                        | 12.8                      | 30.3                                    | 75.0                 | 0.2     |
| 300rpm_720 sec   | 720                     | 300                    | 55.8                                                      | 32.4                        | 10.5                      | 1.3                                     | 78.0                 | 0.1     |
| 300rpm_1200 sec  | 1200                    | 300                    | 58.0                                                      | 32.7                        | 7.8                       | 1.5                                     | 82.2                 | 0.2     |
| 500rpm_30 sec    | 30                      | 500                    | 18.9                                                      | 24.0                        | 35.0                      | 22.1                                    | 45.1                 | 0.3     |
| 500rpm_300 sec   | 300                     | 500                    | 27.2                                                      | 29.8                        | 19.9                      | 23.1                                    | 64.0                 | 0.2     |
| 500rpm_720 sec   | 720                     | 500                    | 54.4                                                      | 31.1                        | 12.6                      | 1.9                                     | 74.2                 | 0.1     |
| 500rpm_1200 sec  | 1200                    | 500                    | 56.7                                                      | 31.6                        | 10.5                      | 1.1                                     | 77.5                 | 0.2     |
| 800rpm_30 sec    | 30                      | 800                    | 3.0                                                       | 22.2                        | 42.2                      | 32.6                                    | 38.4                 | 0.2     |
| 800rpm_300 sec   | 300                     | 800                    | 12.1                                                      | 29.8                        | 23.8                      | 34.3                                    | 59.9                 | 0.1     |
| 800rpm_720 sec   | 720                     | 800                    | 49.6                                                      | 30.2                        | 15.4                      | 4.8                                     | 69.8                 | 0.2     |
| 800rpm_1200 sec  | 1200                    | 800                    | 56.9                                                      | 32.2                        | 9.6                       | 1.3                                     | 79.1                 | 0.2     |
| 2000rpm_30 sec   | 30                      | 2000                   | 11.9                                                      | 17.6                        | 50.4                      | 20.0                                    | 29.0                 | 0.3     |
| 2000rpm_300 sec  | 300                     | 2000                   | 10.2                                                      | 23.7                        | 36.3                      | 29.7                                    | 43.9                 | 0.2     |
| 2000rpm_720 sec  | 720                     | 2000                   | 9.2                                                       | 26.0                        | 29.8                      | 35.1                                    | 51.1                 | 0.2     |
| 2000rpm_1200 sec | 1200                    | 2000                   | 7.1                                                       | 27.2                        | 27.0                      | 38.6                                    | 54.7                 | 0.2     |
